1 **OCR-Stats: Robust estimation and statistical testing of mitochondrial**  
2 **respiration activities using Seahorse XF Analyzer**

3 Vicente A. Yépez M.<sup>a,b</sup>, Laura S. Kremer<sup>c,d</sup>, Arcangela Iuso<sup>c,d</sup>, Mirjana Gušić<sup>c,d</sup>,  
4 Robert Kopajtich<sup>c,d</sup>, Eliška Koňářiková<sup>c,d</sup>, Agnieszka Nadel<sup>c,d</sup>, Leonhard Wachutka<sup>a</sup>,  
5 Holger Prokisch<sup>c,d</sup> and Julien Gagneur<sup>a,b,\*</sup>  
6

7 a. Department of Informatics, Technical University Munich, Boltzmannstr. 3, 85748 Garching,  
8 Germany.

9 b. Quantitative Biosciences Munich, Gene Center, Department of Biochemistry, Ludwig-  
10 Maximilians Universität München

11 c. Institute of Human Genetics, Helmholtz Zentrum München, Ingolstädter Landstr. 1, 85764  
12 Neuherberg, Germany.

13 d. Institute of Human Genetics, Klinikum rechts der Isar, Technical University Munich,  
14 Ismaninger Str. 22, 81675 München, Germany.

15

16 \*Correspondence to: J.G. ([gagneur@in.tum.de](mailto:gagneur@in.tum.de))

17 **Abstract**

18 Accurate quantification of cellular and mitochondrial bioenergetic activity is of great  
19 interest in many medical and biological areas. Mitochondrial stress experiments  
20 performed with Seahorse Bioscience XF Analyzers allow estimating 6 bioenergetics  
21 measures by monitoring oxygen consumption rates (OCR) of living cells in multi-well  
22 plates. However, detailed statistical analyses of OCR measurements from XF  
23 Analyzers have been lacking so far. Here, we performed 126 mitochondrial stress  
24 experiments involving 203 fibroblast cell lines to understand how OCR behaves  
25 across different biosamples, wells, and plates; which allowed us to statistically model  
26 OCR behavior over time. We show that the noise of OCR is multiplicative and that  
27 outlier data points can concern individual measurements or all measurements of a  
28 well. Based on these insights, we developed a novel statistical method, OCR-Stats,  
29 that: i) models multiplicative noise, ii) automatically identifies outlier data points and  
30 outlier wells, and iii) takes into account replicates both within and between plates.  
31 This led to a significant reduction of the coefficient of variation across experiments of  
32 basal respiration by 36% ( $P = 0.004$ ), and of maximal respiration by 32% ( $P = 0.023$ ).  
33 Also, we propose an optimal experimental design with a minimum number of well  
34 replicates needed to obtain confident results. Finally, we use statistical testing taking  
35 into account the inter-plate variation to compare the bioenergetics measures of two  
36 samples.

37 **Keywords:** Oxygen Consumption Rate (OCR); mitochondrial respiration;  
38 bioenergetics; statistical testing; outlier detection.

39 **1. Introduction**

40 Mitochondria are double membrane enclosed, ubiquitous, maternally inherited,  
41 cytoplasmic organelles present in most eukaryotic organisms (Gorman et al., 2016).  
42 They are the powerhouses of the cell (Bhola et al., 2016; Sun et al., 2016), and are  
43 also involved in regulating reactive oxygen species (Wallace, 2007), apoptosis (Bhola  
44 et al., 2016), amino acid synthesis (Birsoy et al., 2015; Sullivan et al., 2015), cell  
45 proliferation (Sullivan et al., 2015), cell signaling (Zong et al., 2016), and in the  
46 regulation of innate and adaptive immunity (Weinberg et al., 2015). It follows that a  
47 decline in mitochondrial function, reflected by a diminished electron transport chain  
48 activity, is implicated in many human diseases ranging from rare genetic disorders  
49 (Titov, Cracan et al., 2016) to common disorders such as cancer (Wallace, 2012;  
50 Zong et al., 2016), diabetes (Dunham-Snary et al., 2014), neurodegeneration (Yao et  
51 al., 2009), and aging (Sun et al., 2016). One of the most informative assessments of  
52 mitochondrial function is the quantification of cellular respiration, as it directly reflects  
53 electron transport chain impairment (Titov, Cracan et al., 2016) and depends on  
54 many sequential reactions from glycolysis to oxidative phosphorylation (Koopman et  
55 al., 2016). Estimations of oxygen consumption rates (OCR) expressed in pmol/min,  
56 which are mainly driven by mitochondrial respiration through oxidative  
57 phosphorylation, and extracellular acidification rates (ECAR) expressed in mpH/min,  
58 which reflect glycolysis (Divakaruni et al., 2014; Ferrick et al., 2008; Koopman et al.,  
59 2016), are more conclusive for the ability to synthesize ATP and mitochondrial  
60 function than measurements of intermediates (such as ATP or NADH) and potentials  
61 (Brand et al., 2011; Dmitriev et al., 2012).

62 OCR was classically measured using a Clark-type electrode, which required a  
63 substantial amount of purified mitochondria, was time consuming, and did not allow  
64 automated injection of compounds (Wu et al., 2007). Also, experimentation with  
65 isolated mitochondria is ineffective because cellular regulation of mitochondrial  
66 function is removed during isolation (Hill et al., 2012). In the last few years, a new  
67 technology using fluorescent oxygen sensors (Gerencser et al., 2009) in a microplate  
68 assay format has been developed by the company Seahorse Bioscience (now part of  
69 Agilent Technologies) (Ribeiro et al., 2015). It allows simultaneous, real-time  
70 measurements of both OCR and ECAR in multiple cell lines and conditions, reducing  
71 the amount of required sample material and increasing the throughput (Divakaruni et  
72 al., 2014; Ribeiro et al., 2015).

73 Typically, OCR and ECAR are measured using the Seahorse XF Analyzer in 96 (or  
74 24) well-plates at multiple time steps under three consecutive treatments (Fig. 1B), in  
75 a procedure known as mitochondrial stress test (Agilent Technologies, 2017). Under  
76 basal conditions, complexes I-IV exploit energy derived from electron transport to

77 pump protons across the inner mitochondrial membrane. The thereby generated  
78 proton gradient is subsequently harnessed by complex V to generate ATP. Blockage  
79 of the proton translocation through complex V by oligomycin represses ATP  
80 production and prevents the electron transport throughout complexes I-IV due to the  
81 unexploited gradient. Administration of FCCP, an ionophor, subsequently dissipates  
82 the gradient uncoupling electron transport from complex V activity and increasing  
83 oxygen consumption to a maximum level. Finally, mitochondrial respiration is  
84 completely halted using the complex I inhibitor Rotenone. This approach is label-free  
85 and non-destructive, so the cells can be retained and used for further assays (Ferrick  
86 et al., 2008). OCR differences between different stages of these procedures provide  
87 estimation of six different bioenergetics measures: basal respiration, proton leak,  
88 non-mitochondrial respiration, ATP production, spare respiratory capacity, and  
89 maximal respiration (Brand et al., 2011; Divakaruni et al., 2014) (Figure 1). Increase  
90 in proton leak and decrease in maximum respiratory capacity are indicators of  
91 mitochondrial dysfunction (Brand et al., 2011). ATP production, basal respiration, and  
92 spare capacity alter in response to ATP demand, which is not necessarily  
93 mitochondrion-related as it may be the consequence of deregulation of any cellular  
94 process altering general cellular energy demand.

95 Current literature describing the Seahorse technology addressed experimental  
96 aspects regarding sample preparation (Dranka et al., 2011; Zhang et al., 2012), the  
97 amount of cells to seed (Zhang et al., 2012; Zhou et al., 2012), and compound  
98 concentration in different organisms (Dranka et al., 2011; Koopman et al., 2016;  
99 Shah-Simpson et al., 2016). However, studies regarding statistical best practices for  
100 determining OCR levels and testing them against another are lacking. The sole  
101 definition of bioenergetic measure varies between authors, as well as the number of  
102 time points in each interval (one time point in (Dranka, Hill, & Darley-Usmar, 2010),  
103 two time points in (Chacko et al., 2014) and four or more time points in (Dunham-  
104 Snary et al., 2014)); and whether differences (Invernizzi et al., 2012; Koopman et al.,  
105 2016; Sullivan et al., 2015), ratios (Yao et al., 2009; Zhang et al., 2011), or both  
106 (Shah-Simpson et al., 2016; Zhou et al., 2012) should be computed. Consequently,  
107 comparison of results across studies is difficult. Moreover, statistical power analyses  
108 for experimental design are often not provided. Differences in OCR between distinct  
109 biosamples (e.g. patient vs. control, or gene knockout vs. WT) can be as low as 12 –  
110 30% (Almontashiri et al., 2014; Mitsopoulos et al., 2015; Stroud et al., 2016).  
111 Therefore, to design experiments with appropriate power to significantly detect such  
112 differences, it is important to know the source and amplitude of the variation within  
113 each sample, and reduce it as much as possible.

114 Here, we developed statistical good practices to support experimentalists in  
115 designing, analyzing, and reporting results of Seahorse mitochondrial stress  
116 experiments. To this end, we analyzed a large dataset of 126 mitochondrial stress  
117 experiments in 96-well plate format involving 203 different fibroblast cell lines (Table  
118 S1). The large amount of between-plate and within-plate replicates allowed us to  
119 statistically characterize the nature and amount of biases and random variations in  
120 these data. Based on these insights, we developed a statistical procedure, called  
121 OCR-Stats, to extract robust and accurate oxygen consumption rates for each well,  
122 which translates into robust summarized values of the multiple replicates inside one  
123 plate and across plates. OCR-Stats includes normalization of raw data and outlier  
124 identification and controls for well and plates biases, which led to significant  
125 increased in accuracy over state-of-the-art methods. Between-well and between-  
126 plate biases, as well as random variations, were found to be essentially multiplicative.  
127 This motivated for a definition of bioenergetics measures based on ratios. We  
128 formally defined 5 such measures: ETC-dependent OC proportion, ATPase-  
129 dependent OC proportion, ETC-dependent proportion of ATPase-independent OC,  
130 and Maximal OC fold change (Fig. 1A). We provide estimators for each one that were  
131 empirically normally distributed, which permitted using linear regression models for  
132 assessing statistical significance of bioenergetics measures comparisons.  
133 Furthermore, our study provides experimental design guidance by i) showing that  
134 between-plate variation largely dominates within-plate variation, implying that it is  
135 important to seed the same biosamples in multiple plates, and ii) providing estimates  
136 of variances within and between plates for each bioenergetic measure allowing for  
137 statistical power computations. A free and open source implementation of OCR-stats  
138 in the statistical language R is provided at [github.com/gagneurlab/OCR-Stats](https://github.com/gagneurlab/OCR-Stats).

## 139 **2. Results**

### 140 **2.1 Experimental design and raw data**

141 We derived OCR, ECAR, and cell number for 203 dermal fibroblast cultures derived  
142 from patients suffering from rare mitochondrial diseases, and control cells from  
143 healthy donors (normal human dermal fibroblasts - NHDF, Methods, Table S1).  
144 These were assayed in 126 plates, all using the same protocol (Methods). We grew  
145 27 cell lines multiple times and placed them in more than one plate. We will refer to  
146 these growth replicates as different biosamples. The NHDF cell line was seeded in all  
147 plates for assessment of potential systematic plate biases. All four corners of each  
148 plate were left as blank, i.e. filled with media but no cells to control for changes in  
149 temperature (Dranka et al., 2011). The typical layout of a plate is depicted in Fig. 1C,

150 showing how each biosample is present in many well replicates. We seeded between  
151 3 and 7 biosamples per plate (median = 4). This variation reflects typical set-ups of  
152 experiments in a lab performed over multiple years.

153 We used the standard mitochondrial stress test assay (Fig. 1A, (Agilent  
154 Technologies, 2017)) leading to four time intervals with three time points each and  
155 denoted by Int<sub>1</sub> (resting cells), Int<sub>2</sub> (after oligomycin), Int<sub>3</sub> (after FCCP) and Int<sub>4</sub> (after  
156 Rotenone). Wells for which the median OCR level did not follow the expected order,  
157 namely, median(OCR(Int<sub>312158 median(OCR(Int<sub>4</sub>)), were discarded (977 wells, 10.47%). We also excluded from the  
159 analysis contaminated wells and wells in which the cells got detached (461 wells,  
160 4.94%, Methods).</sub>

161

## 162 **2.2 Random and systematic variations between replicates within plates**

163 Typical replicate time series are shown in Fig. 2A, with data from 12 wells for a single  
164 biosample in a single plate. It shows the kinds of variations that we observed.

165

166 First, outlier data points occurred frequently. We distinguished two different types of  
167 outliers: entire series for a well (e.g., well G5 in Fig. 2A) and individual data points  
168 (e.g., well B6 at time point 6 in Fig. 2A). In the latter case, eliminating the entire  
169 series for well B6 would be too restrictive, and would result in losing valuable data  
170 from the other 11 valid time points. Therefore, methods to find outliers considering  
171 these two possibilities must be devised.

172

173 Second, we noticed that the higher the OCR value, the higher the variance between  
174 replicates, suggesting that the error is multiplicative. Unequal variance, or  
175 heteroscedasticity, can strongly affect the validity of statistical tests and the  
176 robustness of estimations. We therefore suggest modeling OCR on a logarithmic  
177 scale, where the dependency between variance and mean disappears (Figs. 2B, 2C).  
178 Respiratory chain enzyme activities such as NADH-ubiquinone reductase have  
179 already been shown to obey log-normal distributions (Hautakangas et al., 2016).

180

181 Third, we observed systematic biases in OCR between wells (e.g., OCR values of  
182 well C6 are among the highest while OCR values of well B5 are among the lowest at  
183 all time points, Fig. 2A). Variations in cell number, initial conditions, treatment  
184 concentrations, and fluorophore sleeve calibration can lead to systematic differences  
185 between wells, which we refer to as well biases. To investigate whether well biases  
186 could be mostly corrected using cell number as suggested in (Dranka et al., 2010),

187 we counted the number of cells after the experiments using Cyquant (Methods). As  
188 expected, median OCR for each interval grows linearly with cell number measured at  
189 the end of the experiment (Spearman rho between 0.32 and 0.47,  $P < 2.2e-16$ , Fig.  
190 S1A). However, the relation is not perfect reflecting important additional sources of  
191 variations, and also possible noise in measuring cell number. Strikingly, dividing OCR  
192 by cell count led to a higher coefficient of variation (standard deviation divided by the  
193 mean) between replicate wells than without that correction (Fig. S1B). This analysis  
194 showed that normalization for cell number should not be done simply by a blunt  
195 division by raw cell counts and motivated us to derive another method to capture well  
196 biases.

### 197 **2.3 A statistical model of OCR**

198 Building on these insights, we next introduced a statistical model of OCR within plate.  
199 For a given biosample in one plate, we modeled the logarithm of OCR  $y_{w,t}$  of well  $w$   
200 at time point  $t$  as a sum of well bias, interval effects and noise, i.e.,:

$$y_{w,t} = \alpha_{i(t)} + \beta_w + \varepsilon_{w,t}. \quad (1)$$

201 The term  $\alpha_{i(t)}$  is the effect of the interval  $i(t)$  of time point  $t$ . The term  $\beta_w$  is the relative  
202 bias of well  $w$  compared to a reference well, which is set arbitrarily and corresponds  
203 to the first well in alphabetical order. The term  $\varepsilon_{w,t}$  is the error.

204 We defined the OCR levels ( $\theta_i$ ) as the expected log OCR per interval, averaged over  
205 all wells:

$$\hat{\theta}_i = \alpha_i(t) + \frac{\sum_w \beta_w}{n}, \quad (2)$$

206 where  $n$  is the number of wells.

207 Note that the well bias is modeled independently for each plate, i.e., the bias of a  
208 certain well in one plate is different from the bias of the well at the same location in  
209 another plate.

210 We present now our OCR-Stats algorithm, for a given plate:

- 211 1. Fit the log linear model (1) using the least-squares method, which consists in  
212 minimizing  $\sum_w \sum_t (y_{w,t} - \alpha_{i(t)} - \beta_w)^2$ , thus obtaining the coefficients  $\alpha_i$ ,  $\beta_w$ ; and  
213  $\hat{\theta}_i$  using (2).
- 214 2. For each time point  $t$  in interval  $i$  and well  $w$ , define the OCR residual:  
215  $e_{w,t} = y_{w,t} - \hat{\theta}_{i(t)}$ , which is used to identify outliers (Methods).
- 216 3. Identify and remove well level outliers, fit again, iteratively, until no more are  
217 found.
- 218 4. Identify and remove single point outliers, fit again, iteratively, until no more  
219 are found.

220 5. Scale back to natural scale in order to compute the bioenergetics measures  
221 (e.g.: Basal respiration =  $e^{\theta_1} - e^{\theta_4}$ , Maximal respiration =  $e^{\theta_3} - e^{\theta_4}$ , etc.), or  
222 take the difference in the logarithmic scale to obtain the metrics from Table 1.

## 223 **2.4 Variations within plates**

224 We were then interested in determining the amplitude of the variance inside each  
225 plate in order to compute the number of wells needed to obtain robust estimates  $\hat{\theta}$ .  
226 Using only the controls NHDF, we computed the standard deviation  $\sigma_{i,j}^w$  of the  
227 logarithm of OCR across all wells for each plate  $j$  and interval  $i$ . Then, we computed  
228 the median across plates, thus obtaining one value  $\sigma_i^w$  per interval ( $\sigma_1^w = 0.10$ ,  $\sigma_2^w =$   
229  $0.13$ ,  $\sigma_3^w = 0.12$ ,  $\sigma_4^w = 0.16$ ). As we worked in the logarithmic scale, the error in the  
230 natural scale becomes multiplicative and relative. The standard error of the estimates  
231  $\hat{\theta}$  can be expressed as  $\sigma_{\hat{\theta}_i} = \sigma_i^w / \sqrt{n_w}$ , where  $n_w$  is the number of wells. The highest  
232 value of  $\sigma_i^w$  was 0.16, so in order to get a relative error of 5%, cells should be seeded  
233 in 10 wells. This result comes from a variation after removing outliers, so considering  
234 that around 16.5% of wells were found to be outliers, then ideally we should use 10/  
235  $(1 - 0.165) \approx 12$  wells per biosample.

## 236 **2.5 Variations between plates**

237 After analyzing the variation among wells inside plates, we set up to study the  
238 variation across multiple plates. Using data from the controls NHDF, we found that  
239 the variability between plates for all four intervals is much larger than between wells  
240 (Table S2, Fig. S4). We next asked whether there exists a systematic plate bias that  
241 could be corrected for. We indeed observed a similar increase in OCR on the interval  
242 1 for both biosamples on plate #20140430 with respect to #20140428 (Fig. 3A). To  
243 test whether this tendency held across every repeated biosample, we compared all  
244 replicate pairings with their respective NHDF controls and found a positive correlation  
245 (Fig. 3B). These differences can come from changes in temperature or the use of  
246 different sensor cartridges (Koopman et al., 2016). Because the plate biases are  
247 systematic, we can correct for them using a log linear model (Methods). Nonetheless,  
248 the biases do not explain all the between plate variation as the remaining variance is  
249 large (relative variance of the residuals:  $I_1$ : 49.8%,  $I_2$ : 51.6%,  $I_3$ : 65.6% and  $I_4$ :  
250 55.9%). It is therefore important to perform multiple plate analyses to be able to  
251 conclude for a reproducible systematic difference between biosamples.

252

## 253 **2.6 Statistical comparison between biosamples**

254 In order to compare the bioenergetics measures of two biosamples, we first need to  
 255 decide if it is better evaluating differences or ratios of the OCR levels in the natural  
 256 scale. Even after correcting for well biases, there is a remaining cell number effect  
 257 (Fig. 3C); therefore, we recommend working with ratios of OCR levels (or differences  
 258 in the logarithmic scale). We propose the following definitions:

| OCR ratios                                        | Abbr.              | Metrics                                                             | Tested differences $d$                                                    | Equivalent          |
|---------------------------------------------------|--------------------|---------------------------------------------------------------------|---------------------------------------------------------------------------|---------------------|
| ETC-dependent OC proportion                       | E/I – proportion   | $\frac{OCR_1 - OCR_4}{OCR_1} = 1 - \exp(\theta_{Ei} - \theta_I)$    | $(\theta_{I,f} - \theta_{Ei,f}) - (\theta_{I,ctrl} - \theta_{Ei,ctrl})$   | Basal Respiration   |
| ATPase-dependent OC proportion                    | A/I – proportion   | $\frac{OCR_1 - OCR_2}{OCR_1} = 1 - \exp(\theta_{Ai} - \theta_I)$    | $(\theta_{I,f} - \theta_{Ai,f}) - (\theta_{I,ctrl} - \theta_{Ai,ctrl})$   | ATP Production      |
| ETC-dependent proportion of ATPase-independent OC | E/Ai – proportion  | $\frac{OCR_2 - OCR_4}{OCR_2} = 1 - \exp(\theta_{Ei} - \theta_{Ai})$ | $(\theta_{Ai,f} - \theta_{Ei,f}) - (\theta_{Ai,ctrl} - \theta_{Ei,ctrl})$ | Proton Leak         |
| Maximal OC fold change                            | M/I – fold change  | $\frac{OCR_3}{OCR_1} = \exp(\theta_M - \theta_I)$                   | $(\theta_{M,f} - \theta_{I,f}) - (\theta_{M,ctrl} - \theta_{I,ctrl})$     | Spare Capacity      |
| Maximal over ETC-independent OC fold change       | M/Ei – fold change | $\frac{OCR_3}{OCR_4} = \exp(\theta_M - \theta_{Ei})$                | $(\theta_{M,f} - \theta_{Ei,f}) - (\theta_{M,ctrl} - \theta_{Ei,ctrl})$   | Maximal Respiration |



**Table 1: OCR ratios, metrics and equivalents**

259 Then, for any given OCR ratio  $b$  (eg. M/Ei - fold change), we test differences of log  
260 OCR ratios of patient versus a control cell line (Table 1) using the following linear  
261 model:

$$d_{b,f,p} = \mu_{b,f} + \epsilon_{b,f,p}, (3)$$

262 where  $d_{b,f,p}$  corresponds to the difference of ratio  $b$  of a cell line  $f$  and the respective  
263 control on plate  $p$ . We solve it using linear regression, thus obtaining one value  $\mu_{b,f}$   
264 per each ratio  $b$  and cell line  $f$ . We then compare these  $\mu_{b,f}$  values (which follow a t-  
265 Student distribution) against the null hypothesis  $\mu_{b,f} = 0$  to obtain p-values and  
266 confidence intervals (Figs. 4A, 4B, Methods).

267 **2.7 Benchmark of OCR-Stats algorithm**

268 In order to benchmark the OCR-Stats algorithm, we computed the coefficient of  
269 variation (standard deviation divided by mean) of the six bioenergetics measures in  
270 the natural scale of all repeated biosamples across plates. The lower the coefficient  
271 of variation among replicates, the better the method. We cannot test using the final  
272 estimates  $\hat{\theta}^f$  after correcting for plate effect, because we would fall into circularity as  
273 correcting using  $\beta_{i,p}$  forces replicates to have a closer value. Therefore, just for  
274 benchmarking purposes, we corrected for plate effect using only the data from the  
275 controls NHDF  $c$  of each plate, namely:

$$y_{i,p}^c = \beta_0^c + \beta_i^c + \beta_p^c + \epsilon_{i,p}. (4)$$

276 We solved (4) using linear regression and used the effects  $\beta_p^c$  as offsets in (1), and  
277 recomputed  $\hat{\theta}_i$  values accordingly. We scaled back to natural scale to calculate the  
278 bioenergetics measures and the coefficient of variation of all repeated biosamples  
279 (except the control to avoid circularity) using: i) the default Extreme Differences (ED)  
280 method (Methods) provided by the vendor, ii) the log linear (LL) corresponding to  
281 steps 1 and 2 of the OCR-Stats algorithm, iii) complete OCR-Stats (LL + outlier  
282 removal), and iv) OCR-Stats after correcting for plate effect (OCR-PE) using (4).  
283 Each step contributed to lowering the coefficient of variation, obtaining a final  
284 significant reduction of 36% and 32% in basal and maximal respiration, respectively,  
285 from OCR-PE with respect to ED ( $P < 0.03$ , one-sided Wilcoxon test) (Fig. 5).

286 **2.8 Benchmark of OCR-Stats statistical testing method**

287 We applied OCR-Stats, Extreme Differences with Wilcoxon test within each plate  
288 (within-plate ED), and Extreme Differences with Wilcoxon test across plates (across-  
289 plate ED) to obtain the M/Ei ratio and maximal respiration (MR) of all the 26 cell lines  
290 that were seeded in more than one plate (Methods). For every approach we

291 computed p-values for significant fold-changes against the controls. Six of these cell  
292 lines come from patients with rare variants in genes associated with an established  
293 cellular respiratory defect, allowing for assessing the sensitivity of each approach  
294 (Table S3, (Haack et al., 2013; Hildick-Smith et al., 2013; Kremer et al., 2017;  
295 Pronicka et al., 2016; Van Haute et al., 2016)). Also, two cell lines (#73901 and  
296 #91410) that showed no significant respiratory defects in earlier studies (Powell et  
297 al., 2015) (Kremer et al., 2016) served as negative controls.

298

299 The within-plate ED method reported significantly higher or lower MR for  
300 56/69=81.2% biosamples (Figs. 4A, 4B, Table S3). Moreover, every cell line was  
301 found to be significant on at least one plate, despite large variation in M/Ei fold  
302 change between plates (Fig. 4A). Also, for 11 cell lines, one plate at least also gave  
303 non-significant differences. These results show the importance of assessing  
304 differences using multiple plates and advocate for a more robust approach than  
305 within-plate ED.

306

307 One approach to take multiple plates into accounts is to perform a Wilcoxon test  
308 based on per plate average ED values (across-plate ED, Methods). However, this  
309 approach requires samples to be seeded in at least five plates in order to obtain  
310 significant results. Here, only one cell line, #78661, was found significant this way.

311

312 In contrast, significance with the OCR-Stats statistical algorithm can be reached by  
313 seeding a biosample in one plate only; provided there were other between-plate  
314 replicates to compute the inter-plate variance. On this data, OCR-Stats was much  
315 more conservative than within-plate ED and found only 7/26=27% cell lines to have  
316 aggregated significantly lower M/Ei than the control. There was no evidence against  
317 the normality and homoscedasticity assumption of OCR-stats as the quantile-quantile  
318 plots of the residuals aligned well along the diagonal (Figs. 4C, S4). All the 6 positive  
319 control cell lines were reported to have significantly lower M/Ei than control by OCR-  
320 Stats (Figs. 4A, 4B, Table S3). Moreover, OCR-Stats did not report significant M/Ei  
321 differences for the two negative controls. Altogether, these results show that OCR-  
322 Stats successfully identifies and removes variation within and between plates,  
323 providing more stable results which translates into less false positives.

## 324 **Discussion and conclusion**

325 Mitochondrial studies using extracellular fluxes (specifically the XF Analyzer from  
326 Seahorse) are gaining popularity; therefore, it is of paramount importance to have a

327 proper statistical method to estimate the OCR levels from the raw data. In this paper,  
328 we have developed such a model, which includes approaches to control for well and  
329 plate biases, and automatic outlier identification. By doing so, we were able to  
330 significantly reduce the coefficient of variation of replicates across plates. After  
331 analyzing the intra-plate variation, we found that the minimum number of wells per  
332 biosample should be 12.

333 We found that dividing cellular OCR by cell number was introducing more noise than  
334 was seen for uncorrected data. Here, we seeded always the same number of cells.  
335 Hence, the variations we observed in cell number at the end of the experiments are  
336 largely overestimated by noise in measurements. In other experimental settings, in  
337 which different numbers of cells are seeded, we suggest to include an offset term to  
338 the model (1) equal to the logarithm of the seeded cell number to control for this  
339 variation by design. Also, the Seahorse XF Analyzer can be used on isolated  
340 mitochondria and on isolated enzymes, where a normalization approach is to divide  
341 OCR by mitochondrial proteins or enzyme concentration (Seahorse Bioscience,  
342 2014). However, as described here for cellular assays, robust normalization  
343 procedures require careful analysis.

344 To use XF Seahorse Analyzers for large-scale experiments, one needs to be able to  
345 compare biosamples measured on different plates. Our investigation showed that  
346 there is roughly multiplicative bias between plates that can be controlled to some  
347 extent by including control biosamples across plates, as we did here with NHDF. We  
348 proposed an extension of our intra-plate robust linear regression approach to multiple  
349 plates that can handle model this plate bias. However, we also noticed that the  
350 assumption of a multiplicative plate bias is not sufficient as there are other sources of  
351 variation. Therefore, for comparing two biosamples statistically, they need to be  
352 placed on the same plate, and repeated multiple times. We demonstrated that it is  
353 better to compare OCR ratios rather than differences as this eliminates sources of  
354 variation like cell number. We proposed another linear model that takes into account  
355 the inter-plate variation, which we showed to agree with previous results of patients  
356 diagnosed with mitochondrial disorders.

357 We also encourage users to understand the biological meaning of each OCR ratio  
358 (Table 1). For example, cell line #73387 was found to have a lower, but non  
359 significantly ( $P < 0.10$ ), M/Ei ratio (the most common metric used throughout the  
360 literature, Table S3), but when analyzing its E/I proportion, we found that it was  
361 drastically lower than the control ( $P < 1.2 \times 10^{-7}$ ). This result is consistent with its

362 genetic diagnosis (Table S1, (Oláhová et al., 2015)). For visualizing OCR ratios, raw  
363 OCR vs. time plots are useful in both logarithmic and natural scales.

364 In principle, OCR-Stats should be able to estimate ECAR levels. Nevertheless,  
365 similar analyses as performed here should be done beforehand in order to guarantee  
366 that the method is indeed applicable. Preliminary investigations suggest that the  
367 nature of noise (outliers, multiplicative) is similar than for OCR.

368 Finally, it is important to understand further sources of variations between plates, cell  
369 cultures, treatments and other factors in order to correct for them. Here, we found  
370 that gender does not significantly influence OCR levels (Fig. S5), but age (for which  
371 we have no register), may play a role.

## 372 **Methods**

### 373 **Biological material**

374 All biosamples come from primary fibroblast cell lines of humans suffering from rare  
375 mitochondrial diseases, established in the framework of mitoNet and GENOMIT. The  
376 controls used are primary patient fibroblast cell lines, normal human dermal  
377 fibroblasts (NHDF) from neonatal tissue, commercially available from Lonza, Basel,  
378 Switzerland.

### 379 **Measure of extracellular fluxes using Seahorse XF96**

380 We seeded 20,000 fibroblasts cells in each well of a XF 96-well cell culture  
381 microplate in 80 ml of culture media, and incubated overnight at 37°C in 5% CO<sub>2</sub>.  
382 The four corners were left only with medium for background correction. Culture  
383 medium is replaced with 180 ml of bicarbonate-free DMEM and cells are incubated at  
384 37°C for 30 min before measurement. Oxygen consumption rates (OCR) were  
385 measured using a XF96 Extracellular Flux Analyzer (Agilent Technologies, 2017).  
386 OCR was determined at four levels: with no additions, and after adding: oligomycin (1  
387 µM); carbonyl cyanide 4-(trifluoromethoxy) phenylhydrazone (FCCP, 0.4 µM); and  
388 rotenone (2 µM) (additives purchased from Sigma at highest quality). After each  
389 assay, manual inspection was performed on all wells using a conventionally light  
390 microscope.

### 391 **Cell number quantification**

392 Cell number was quantified using the CyQuant Cell Proliferation Kit (Thermo Fisher  
393 Scientific, Waltham, MA, USA) according to the manufacturer's protocol. In brief,  
394 cells were washed with 200 µL PBS per well and frozen in the microplate at -80°C  
395 to ensure subsequent cell lysis. Cells were thawed and resuspended vigorously in 200  
396 µL 1x cell-lysis buffer supplemented with 1x CyQUANT GR dye per well.

397 Resuspended cells were incubated in the dark for 5 min at RT whereupon  
398 fluorescence was measured (excitation: 480 nm, emission: 520 nm).

### 399 **Extreme Differences (default) Method to compute bioenergetics measures**

400 On every plate independently, for each well, on interval 1 take the OCR  
401 corresponding to the last measurement, on intervals 2 and 4 take the minimum and  
402 on interval 3 the maximum OCR value (Divakaruni et al., 2014). Then, do the  
403 corresponding differences to estimate the bioenergetics measures. Report the results  
404 per patient as the mean across wells plus standard deviation or standard error,  
405 separately for each plate.

### 406 **Outlier Removal**

407 For each sample  $s$  and well  $w$ , compute the mean across time points of its squared  
408 residuals:  $r_w := \text{mean}_t(e_{w,t}^2)$ , thus obtaining a distribution  $r$ . Identify as outliers the  
409 wells whose  $r_w > \text{median}(r) + 5 \cdot \text{mad}(r)$ , where  $\text{mad}$ , median absolute deviation, is  
410 a robust estimation of the standard deviation (Fig. S2A). We found that deviations by  
411 5  $\text{mad}$  from the median were selective enough in practice. Compute the vector of  
412 estimates  $\hat{\theta}$  using the remaining wells and iterate this procedure until no more wells  
413 are identified as outliers. It required 8 iterations until convergence and around 16.5%  
414 of all the wells were found to be outliers (Fig. S2B).

415 Single point outliers are identified in a similar way. After discarding the wells that  
416 were found to be outliers in the previous step, categorize as outliers single data  
417 points whose  $e_{w,t}^2 > \text{median}_t(e_{w,t}^2) + 5 \cdot \text{mad}_t(e_{w,t}^2)$  (Fig. S2C). Iterate until no  
418 more outliers are found. It required 19 iterations until convergence and approximately  
419 6.1% of single points were found to be outliers (Fig. S2D).

### 420 **Plate effect model**

421 In an attempt to correct for plate effect, we propose a log linear model where the  
422 levels  $\theta'$  depend on interval  $i$ , samples  $s$  and plate  $p$ :

$$\theta'_{i,s,p} = \alpha_{i,s} + \beta_{i,p} + \varepsilon_{i,s,p},$$

423 thus obtaining one coefficient  $\beta_{i,p}$  for each plate-interval combination. These effects  
424 are added to the previous estimates:  $\hat{\theta}_{i,s,p}^f = \hat{\theta}_{i,s} - \beta_{i,p}$ , obtaining the final estimates  
425  $\hat{\theta}^f$ . As for (1), the model is solved using linear regression.

### 426 **Multi-plate averaging method**

427 In case of inter-plate comparisons, the multi-plate averaging methods takes the  
428 average and standard error of the bioenergetics measures obtained using the ED  
429 method of all repeated biosamples across plates (Agilent Technologies, 2016).

### 430 **Statistical Testing**

431 To evaluate the OCR ratios between a fibroblast  $f$  and a control, we use the

432 corresponding tested difference  $d$  (Table 1). For a fibroblast  $f$  located on a plate  $p$ , we  
433 define  $\mu_{i,j,f,p} = [\hat{\theta}_i - \hat{\theta}_j]_{f,p} - [\hat{\theta}_i - \hat{\theta}_j]_{NHDF,p}$ , where  $i$  and  $j$  are any two different  
434 intervals. From there, we can obtain a t-statistic:  $t_{\hat{d}} = \frac{\mu - d_0}{se(\mu)}$ , where  $d_0 = 0$  as that is the  
435 value against we want to compare  $\mu$  against, and  $se$  is the standard error. The t-  
436 statistic follows a t-distribution with  $n - 2$  degrees of freedom, from which we can  
437 obtain p-values. Moreover, we can obtain confidence intervals:  $[\mu - se(\mu)t_{n-2}^\alpha, \mu +$   
438  $se(\mu)t_{n-2}^\alpha]$ , where  $(1 - \alpha)$  is the confidence level and  $t_{n-2}^\alpha$  the  $(1 - \alpha/2)$  quantile of  
439 the  $t_{n-2}$  distribution. Note that the normality assumption holds for the residuals  $\epsilon_{b,f,p}$   
440 (Figs. 4C, S4).

## 441 Acknowledgements

442 We would like to thank Daniel Bader, Žiga Avsec, Jun Cheng and Paula Fernández-  
443 Guerra for valuable discussions and manuscript revision. This study was supported  
444 by the German Bundesministerium für Bildung und Forschung (BMBF) through the E-  
445 Rare project GENOMIT (01GM1603 and 01GM1207, H.P. and T.M.), through the  
446 Juniorverbund in der Systemmedizin 'mitOmics' (FKZ 01ZX1405A J.G., L.W. and  
447 V.A.Y.M.) and the DZHK (German Centre for Cardiovascular Research, L.S.K.). A  
448 Fellowship through the Graduate School of Quantitative Biosciences Munich (QBM)  
449 supports V.A.Y.M.. H.P. is supported by EU FP7 Mitochondrial European Educational  
450 Training Project (317433). J.G., V.A.Y.M. and H.P. are supported by EU Horizon2020  
451 Collaborative Research Project SOUND (633974). We thank the Cell lines and DNA  
452 Bank of Pediatric Movement Disorders and Mitochondrial Diseases of the Telethon  
453 Genetic Biobank Network (GTB09003).

## 454 Author contributions

455 J.G. and H.P. planned the project and overviewed the research. H.P. designed the  
456 experiments. V.A.Y.M. curated and analyzed the data. J.G. devised the statistical  
457 analysis. L.S.K., A.I., E.K., M.G., and A.N. performed the mitochondrial stress test  
458 experiments and cell number quantification. V.A.Y.M., L.W. and J.G. made the  
459 figures. V.A.Y.M. and J.G. wrote the manuscript. All authors performed critical  
460 revision of the manuscript.

## 461 Figure legends

462 **Figure 1. Principle of the mitochondrial stress test assay (A)** Cartoon illustration  
463 of OCR levels (y-axis) versus time (x-axis). Injection of the three compounds  
464 oligomycin, FCCP and rotenone delimit four time intervals within which OCR is  
465 roughly constant. **(B)** Targets of each compound in the electron transport chain. **(C)**  
466 Typical layout of a mitochondrial stress test 96-well plate.

467 **Figure 2. OCR behavior over time.** (A) Typical time series replicates inside a plate.  
468 Behavior of OCR expressed in pmol/min (y-axis) of Fibro\_VY\_017 over time (x-axis).  
469 Colors indicate the row, and shape the column of 12 well replicates. Variation  
470 increases for larger OCR values, OCR has a systematic well effect and there exist  
471 two types of outliers: well-level and single-point. (B) Scatterplot of standard deviation  
472 (y-axis) vs. mean (x-axis) of all 3 time replicates of each interval, well and plate of  
473 OCR of NHDF only, shows a positive correlation ( $n = 409$ ). (C) Same as (B) but for  
474 the logarithm of OCR, where the correlation disappears.

475 **Figure 3. Plate bias.** (A) Log of OCR in interval 3 (y-axis) for the cell lines #65126  
476 and NHDF (x-axis) which were seeded in 2 different plates (color-coded). The similar  
477 increase in OCR from plate #20140128 to #20140430 in both biosamples suggests  
478 that there is a systematic plate bias. (B) Scatterplots of the differences of the  
479 logarithm of OCR levels  $\theta$  of all possible 2 by 2 combinations of repeated biosamples  
480 across experiments (y-axis) against their respective controls (NHDF) (x-axis) show  
481 that there exists a positive correlation ( $l_1: \rho = 0.64, P < 2.3 \times 10^{-8}$ ,  $l_2: \rho = 0.65, P <$   
482  $1.2 \times 10^{-8}$ ,  $l_3: \rho = 0.52, P < 1.2 \times 10^{-5}$ ,  $l_4: \rho = 0.64, P < 1.4 \times 10^{-8}$ ), suggesting a systematic  
483 plate bias ( $n = 63$ ). (C) Scatterplot of the difference of log OCR levels of patients vs.  
484 control NHDF (both axes) of every interval with respect to another. All intervals  
485 correlate with each other even after removing plate bias (by subtracting control  
486 values).

487 **Figure 4. Statistical testing of M/Ei fold change patient vs. control on multiple**  
488 **plates.** (A) Ratio of M/Ei fold change (y-axis) of all cell lines repeated across plates  
489 (x-axis) and their respective control, sorted by p-value obtained using the OCR-Stats  
490 method. Left of the red dashed line are cell lines with significantly lower M/Ei fold  
491 change using OCR-Stats. Dots in orange represent cell lines with significantly lower  
492 or higher M/Ei fold change using the ED method. Highlighted positive (+) and  
493 negative (-) controls. (B) Similar as (A), but depicting the p-value in logarithmic scale  
494 (y-axis) using OCR-Stats. Red dashed line at  $P = 0.05$ . Dots in red represent  
495 biosamples with significantly lower M/Ei fold change using the OCR-Stats method.  
496 (C) Quantile-quantile theoretical (x-axis) vs. observed (y-axis) plot of the residuals of  
497 the linear model (3) applied to M/Ei fold change.

498 **Figure 5. Benchmark using coefficient of variation.** Coefficient of variation (CV =  
499 standard deviation / mean, y-axis) of replicates across experiments ( $n=26$ ) using  
500 different methods (x-axis) to estimate the 6 bioenergetics measures. In all, except for  
501 Spare Capacity, OCR-Stats with plate effect showed significantly lower variation with

502 respect to the Extreme Differences method. P-values obtained from one-sided paired  
503 Wilcoxon test.

## 504 References

- 505 Agilent Technologies. (2016). Multi-File XF Report Generator, User Guide. Retrieved  
506 from [http://www.agilent.com/cs/library/usermanuals/public/Report Generator](http://www.agilent.com/cs/library/usermanuals/public/Report%20Generator%20User%20Guide_Seahorse%20XF%20Cell%20Mito%20Stress%20Test_MultiFile_RevA.pdf)  
507 [User Guide\\_Seahorse XF Cell Mito Stress Test\\_MultiFile\\_RevA.pdf](http://www.agilent.com/cs/library/usermanuals/public/Report%20Generator%20User%20Guide_Seahorse%20XF%20Cell%20Mito%20Stress%20Test_MultiFile_RevA.pdf)  
508 Agilent Technologies. (2017). Mito Stress Test Kit, User Guide, (103016–400).  
509 Retrieved from  
510 [https://www.agilent.com/cs/library/usermanuals/public/XF\\_Cell\\_Mito\\_Stress\\_Te](https://www.agilent.com/cs/library/usermanuals/public/XF_Cell_Mito_Stress_Test_Kit_User_Guide.pdf)  
511 [st\\_Kit\\_User\\_Guide.pdf](https://www.agilent.com/cs/library/usermanuals/public/XF_Cell_Mito_Stress_Test_Kit_User_Guide.pdf)  
512 Almontashiri, N. A. M., Chen, H. H., Mailloux, R. J., Tatsuta, T., Teng, A. C. T.,  
513 Mahmoud, A. B., ... Stewart, A. F. R. (2014). SPG7 Variant Escapes  
514 Phosphorylation-Regulated Processing by AFG3L2, Elevates Mitochondrial  
515 ROS, and Is Associated with Multiple Clinical Phenotypes. *Cell Reports*, *7*(3),  
516 834–847. <http://doi.org/10.1016/j.celrep.2014.03.051>  
517 Bhola, P. D., & Letai, A. (2016). Mitochondria-Judges and Executioners of Cell Death  
518 Sentences. *Molecular Cell*, *61*(5), 695–704.  
519 <http://doi.org/10.1016/j.molcel.2016.02.019>  
520 Birsoy, K., Wang, T., Chen, W. W., Freinkman, E., Abu-Remaileh, M., & Sabatini, D.  
521 M. (2015). An Essential Role of the Mitochondrial Electron Transport Chain in  
522 Cell Proliferation Is to Enable Aspartate Synthesis. *Cell*, *162*, 540–551.  
523 <http://doi.org/10.1016/j.cell.2015.07.016>  
524 Brand, M. D., & Nicholls, D. G. (2011). Assessing mitochondrial dysfunction in cells.  
525 *The Biochemical Journal*, *435*(2), 297–312. <http://doi.org/10.1042/BJ20110162>  
526 Chacko, B. K., Kramer, P. a, Ravi, S., Benavides, G. a, Mitchell, T., Dranka, B. P., ...  
527 Darley-Usmar, V. M. (2014). The Bioenergetic Health Index: a new concept in  
528 mitochondrial translational research. *Clinical Science*, *127*(6), 367–373.  
529 <http://doi.org/10.1042/CS20140101>  
530 Divakaruni, A. S., Paradyse, A., Ferrick, D. A., Murphy, A. N., & Jastroch, M. (2014).  
531 *Analysis and interpretation of microplate-based oxygen consumption and pH*  
532 *data. Methods in Enzymology* (Vol. 547). [http://doi.org/10.1016/B978-0-12-](http://doi.org/10.1016/B978-0-12-801415-8.00016-3)  
533 [801415-8.00016-3](http://doi.org/10.1016/B978-0-12-801415-8.00016-3)  
534 Dmitriev, R. I., & Papkovsky, D. B. (2012). Optical probes and techniques for O<sub>2</sub>  
535 measurement in live cells and tissue. *Cellular and Molecular Life Sciences*, *69*,  
536 2025–2039. <http://doi.org/10.1007/s00018-011-0914-0>  
537 Dranka, B. P., Benavides, G. A., Diers, A. R., Giordano, S., Blake, R., Reily, C., ...  
538 Darley-Usmar, V. M. (2011). Assessing bioenergetic function in response to  
539 oxidative stress by metabolic profiling. *Free Radical Biology and Medicine*,  
540 *51*(9), 1621–1635. <http://doi.org/10.1016/j.freeradbiomed.2011.08.005>  
541 Dranka, B. P., Hill, B. G., & Darley-Usmar, V. M. (2010). Mitochondrial reserve  
542 capacity in endothelial cells: The impact of nitric oxide and reactive oxygen  
543 species. *Free Radical Biology and Medicine*, *48*(7), 905–914.  
544 <http://doi.org/10.1016/j.freeradbiomed.2010.01.015>  
545 Dunham-Snary, K. J., Sandel, M. W., Westbrook, D. G., & Ballinger, S. W. (2014).  
546 Redox Biology A method for assessing mitochondrial bioenergetics in whole  
547 white adipose tissues. *Redox Biology*, *2*, 656–660.  
548 <http://doi.org/10.1016/j.redox.2014.04.005>  
549 Ferrick, D. A., Neilson, A., & Beeson, C. (2008). Advances in measuring cellular  
550 bioenergetics using extracellular flux. *Drug Discovery Today*, *13*(March).  
551 <http://doi.org/10.1016/j.drudis.2007.12.008>  
552 Gerencser, A. A., Neilson, A., Choi, S. W., Edman, U., Yadava, N., Oh, R. J., ...  
553 Brand, M. D. (2009). Quantitative Microplate-Based Respirometry with



- 554 Correction for Oxygen Diffusion. *Analytical Chemistry*, 81(16), 6868–6878.
- 555 Gorman, G. S., Chinnery, P. F., DiMauro, S., Hirano, M., Koga, Y., McFarland, R., ...
- 556 Turnbull, D. M. (2016). Mitochondrial diseases. *Nature Reviews Disease*
- 557 *Primers*, 2. <http://doi.org/10.1038/nrdp.2016.80>
- 558 Haack, T. B., Rolinski, B., Haberberger, B., Zimmermann, F., Schum, J., Strecker, V.,
- 559 ... Prokisch, H. (2013). Homozygous missense mutation in BOLA3 causes
- 560 multiple mitochondrial dysfunctions syndrome in two siblings. *Journal of*
- 561 *Inherited Metabolic Disease*, 36(1), 55–62. <http://doi.org/10.1007/s10545-012->
- 562 9489-7
- 563 Hautakangas, M. R., Hinttala, R., Rantala, H., Nieminen, P., Uusimaa, J., &
- 564 Hassinen, I. E. (2016). Evaluating clinical mitochondrial respiratory chain
- 565 enzymes from biopsy specimens presenting skewed probability distribution of
- 566 activity data. *Mitochondrion*, 29, 53–58.
- 567 <http://doi.org/10.1016/j.mito.2016.05.004>
- 568 Hildick-Smith, G. J., Cooney, J. D., Garone, C., Kremer, L. S., Haack, T. B., Thon, J.
- 569 N., ... Paw, B. H. (2013). Macrocytic anemia and mitochondriopathy resulting
- 570 from a defect in sideroflexin 4. *American Journal of Human Genetics*, 93(5),
- 571 906–914. <http://doi.org/10.1016/j.ajhg.2013.09.011>
- 572 Hill, B. G., Benavides, G. A., Jr, J. R. L., Ballinger, S., & Italia, L. D. (2012).
- 573 Integration of cellular bioenergetics with mitochondrial quality control and
- 574 autophagy. *Biological Chemistry*, 393(12), 1485–1512.
- 575 <http://doi.org/10.1515/hsz-2012-0198>
- 576 Invernizzi, F., D'Amato, I., Jensen, P. B., Ravaglia, S., Zeviani, M., & Tiranti, V.
- 577 (2012). Microscale oxygraphy reveals OXPHOS impairment in MRC mutant
- 578 cells. *Mitochondrion*, 12(2), 328–335. <http://doi.org/10.1016/j.mito.2012.01.001>
- 579 Koopman, M., Michels, H., Dancy, B. M., Kamble, R., Mouchiroud, L., Auwerx, J., ...
- 580 Houtkooper, R. H. (2016). A screening-based platform for the assessment of
- 581 cellular respiration in *Caenorhabditis elegans*. *Nature Protocols*, 11(10), 1798–
- 582 1816. <http://doi.org/10.1038/nprot.2016.106>
- 583 Kremer, L. S., Bader, D. M., Mertes, C., Kopajtich, R., Pichler, G., Iuso, A., ...
- 584 Prokisch, H. (2017). Genetic diagnosis of Mendelian disorders via RNA
- 585 sequencing. *Nature Communications*, 8, 15824.
- 586 <http://doi.org/10.1038/ncomms15824>
- 587 Kremer, L. S., Distelmaier, F., Alhaddad, B., Hempel, M., Iuso, A., Küpper, C., ...
- 588 Haack, T. B. (2016). Bi-allelic Truncating Mutations in TANGO2 Cause Infancy-
- 589 Onset Recurrent Metabolic Crises with Encephalocardiomyopathy. *American*
- 590 *Journal of Human Genetics*, 98(2), 358–362.
- 591 <http://doi.org/10.1016/j.ajhg.2015.12.009>
- 592 Mitsopoulos, P., Chang, Y.-H., Wai, T., König, T., Dunn, S. D., Langer, T., &
- 593 Madrenas, J. (2015). Stomatin-like protein 2 is required for in vivo mitochondrial
- 594 respiratory chain supercomplex formation and optimal cell function. *Molecular*
- 595 *and Cellular Biology*, 35(10), 1838–47. <http://doi.org/10.1128/MCB.00047-15>
- 596 Oláhová, M., Hardy, S. A., Hall, J., Yarham, J. W., Haack, T. B., Wilson, W. C., ...
- 597 Taylor, R. W. (2015). LRPPRC mutations cause early-onset multisystem
- 598 mitochondrial disease outside of the French-Canadian population. *Brain*,
- 599 138(12), 3503–3519. <http://doi.org/10.1093/brain/awv291>
- 600 Powell, C. A., Kopajtich, R., D'Souza, A. R., Rorbach, J., Kremer, L. S., Husain, R.
- 601 A., ... Minczuk, M. (2015). TRMT5 Mutations Cause a Defect in Post-
- 602 transcriptional Modification of Mitochondrial tRNA Associated with Multiple
- 603 Respiratory-Chain Deficiencies. *American Journal of Human Genetics*, 97(2),
- 604 319–328. <http://doi.org/10.1016/j.ajhg.2015.06.011>
- 605 Pronicka, E., Piekutowska-Abramczuk, D., Ciara, E., Trubicka, J., Rokicki, D.,
- 606 Karkucińska-Więckowska, A., ... Płoski, R. (2016). New perspective in
- 607 diagnostics of mitochondrial disorders: two years' experience with whole-exome
- 608 sequencing at a national paediatric centre. *Journal of Translational Medicine*,

- 609 14(1), 174. <http://doi.org/10.1186/s12967-016-0930-9>
- 610 Ribeiro, S. M., Giménez-cassina, A., & Danial, N. N. (2015). Measurement of  
611 Mitochondrial Oxygen Consumption Rates in Mouse Primary Neurons and  
612 Astrocytes. *Methods in Molecular Biology*, 1241, 59–69.  
613 <http://doi.org/10.1007/978-1-4939-1875-1>
- 614 Seahorse Bioscience. (2014). Normalizing XF metabolic data to cellular or  
615 mitochondrial parameters, User Guide. Retrieved from  
616 [http://hpst.cz/sites/default/files/attachments/appnote-normalizing-metabolic-](http://hpst.cz/sites/default/files/attachments/appnote-normalizing-metabolic-data.pdf)  
617 [data.pdf](http://hpst.cz/sites/default/files/attachments/appnote-normalizing-metabolic-data.pdf)
- 618 Shah-Simpson, S., Pereira, C. F. A., Dumoulin, P. C., Caradonna, K. L., & Burleigh,  
619 B. A. (2016). Bioenergetic profiling of *Trypanosoma cruzi* life stages using  
620 Seahorse extracellular flux technology. *Molecular and Biochemical Parasitology*,  
621 208(2), 91–95. <http://doi.org/10.1016/j.molbiopara.2016.07.001>
- 622 Stroud, D. A., Surgenor, E. E., Formosa, L. E., Reljic, B., Frazier, A. E., Dibley, M. G.,  
623 ... Ryan, M. T. (2016). Accessory subunits are integral for assembly and  
624 function of human mitochondrial complex I. *Nature*, 538(7623), 1–17.  
625 <http://doi.org/10.1038/nature19754>
- 626 Sullivan, L. B., Gui, D. Y., Hosios, A. M., Bush, L. N., Freinkman, E., &  
627 Vander Heiden, M. G. (2015). Supporting Aspartate Biosynthesis Is an Essential  
628 Function of Respiration in Proliferating Cells. *Cell*, 162(3), 552–563.  
629 <http://doi.org/10.1016/j.cell.2015.07.017>
- 630 Sun, N., Youle, R. J., & Finkel, T. (2016). The Mitochondrial Basis of Aging.  
631 *Molecular Cell*, 61(5), 654–666. <http://doi.org/10.1016/j.molcel.2016.01.028>
- 632 Titov, D. V., Cracan, V., Goodman, R. P., Peng, J., Grabarek, Z., & Mootha, V. K.  
633 (2016). Complementation of mitochondrial electron transport chain by  
634 manipulation of the NAD<sup>+</sup>/NADH ratio. *Science*, 352(6282), 231–235.  
635 <http://doi.org/10.1126/science.aad4017>
- 636 Van Haute, L., Dietmann, S., Kremer, L., Hussain, S., Pearce, S. F., Powell, C. A., ...  
637 Minczuk, M. (2016). Deficient methylation and formylation of mt-tRNAMet  
638 wobble cytosine in a patient carrying mutations in NSUN3. *Nature*  
639 *Communications*, 7(May), 12039. <http://doi.org/10.1038/ncomms12039>
- 640 Wallace, D. C. (2007). Why do we still have a maternally inherited mitochondrial  
641 DNA? Insights from evolutionary medicine. *Annual Review of Biochemistry*,  
642 76(1), 781–821. <http://doi.org/doi:10.1146/annurev.biochem.76.081205.150955>
- 643 Wallace, D. C. (2012). Mitochondria and cancer. *Nature Reviews Cancer*, 12(10),  
644 685–698. <http://doi.org/10.1038/nrc3365>
- 645 Weinberg, S. E., Sena, L. A., & Chandel, N. S. (2015). Mitochondria in the regulation  
646 of innate and adaptive immunity. *Immunity*, 42(3), 406–417.  
647 <http://doi.org/10.1016/j.immuni.2015.02.002>
- 648 Wu, M., Neilson, A., Swift, A. L., Moran, R., Tamagnine, J., Parslow, D., ... Chomicz,  
649 S. (2007). Multiparameter metabolic analysis reveals a close link between  
650 attenuated mitochondrial bioenergetic function and enhanced glycolysis  
651 dependency in human tumor cells. *The American Journal of Physiology - Cell*  
652 *Physiology*, 292, 125–136. <http://doi.org/10.1152/ajpcell.00247.2006>
- 653 Yao, J., Irwin, R. W., Zhao, L., Nilsen, J., Hamilton, R. T., & Brinton, R. D. (2009).  
654 Mitochondrial bioenergetic deficit precedes Alzheimer's pathology in female  
655 mouse model of Alzheimer's disease. *PNAS*, 106(34), 14670–14675.
- 656 Zhang, J., Khvorostov, I., Hong, J. S., Oktay, Y., Vergnes, L., Nuebel, E., ... Teitell,  
657 M. A. (2011). UCP2 regulates energy metabolism and differentiation potential of  
658 human pluripotent stem cells. *The EMBO Journal*, 30(24), 4860–4873.  
659 <http://doi.org/10.1038/emboj.2011.401>
- 660 Zhang, J., Nuebel, E., Wisidagama, D. R. R., Setoguchi, K., & Hong, J. S. (2012).  
661 Measuring energy metabolism in cultured cells, including human pluripotent  
662 stem cells and differentiated cells. *Nature Protocols*, 7(6).  
663 <http://doi.org/10.1038/nprot.2012.048> Measuring

664 Zhou, W., Choi, M., Margineantu, D., Margaretha, L., Hesson, J., Cavanaugh, C., ...  
665 Ruohola-Baker, H. (2012). HIF1 $\alpha$  induced switch from bivalent to exclusively  
666 glycolytic metabolism during ESC-to-EpiSC/hESC transition. *The EMBO*  
667 *Journal*, 31(9), 2103–2116. <http://doi.org/10.1038/emboj.2012.71>  
668 Zong, W.-X., Rabinowitz, J. D., & White, E. (2016). Mitochondria and Cancer.  
669 *Molecular Cell*, 166(3), 555–566. <http://doi.org/10.1016/j.cell.2016.07.002>  
670



**Fig. 2**

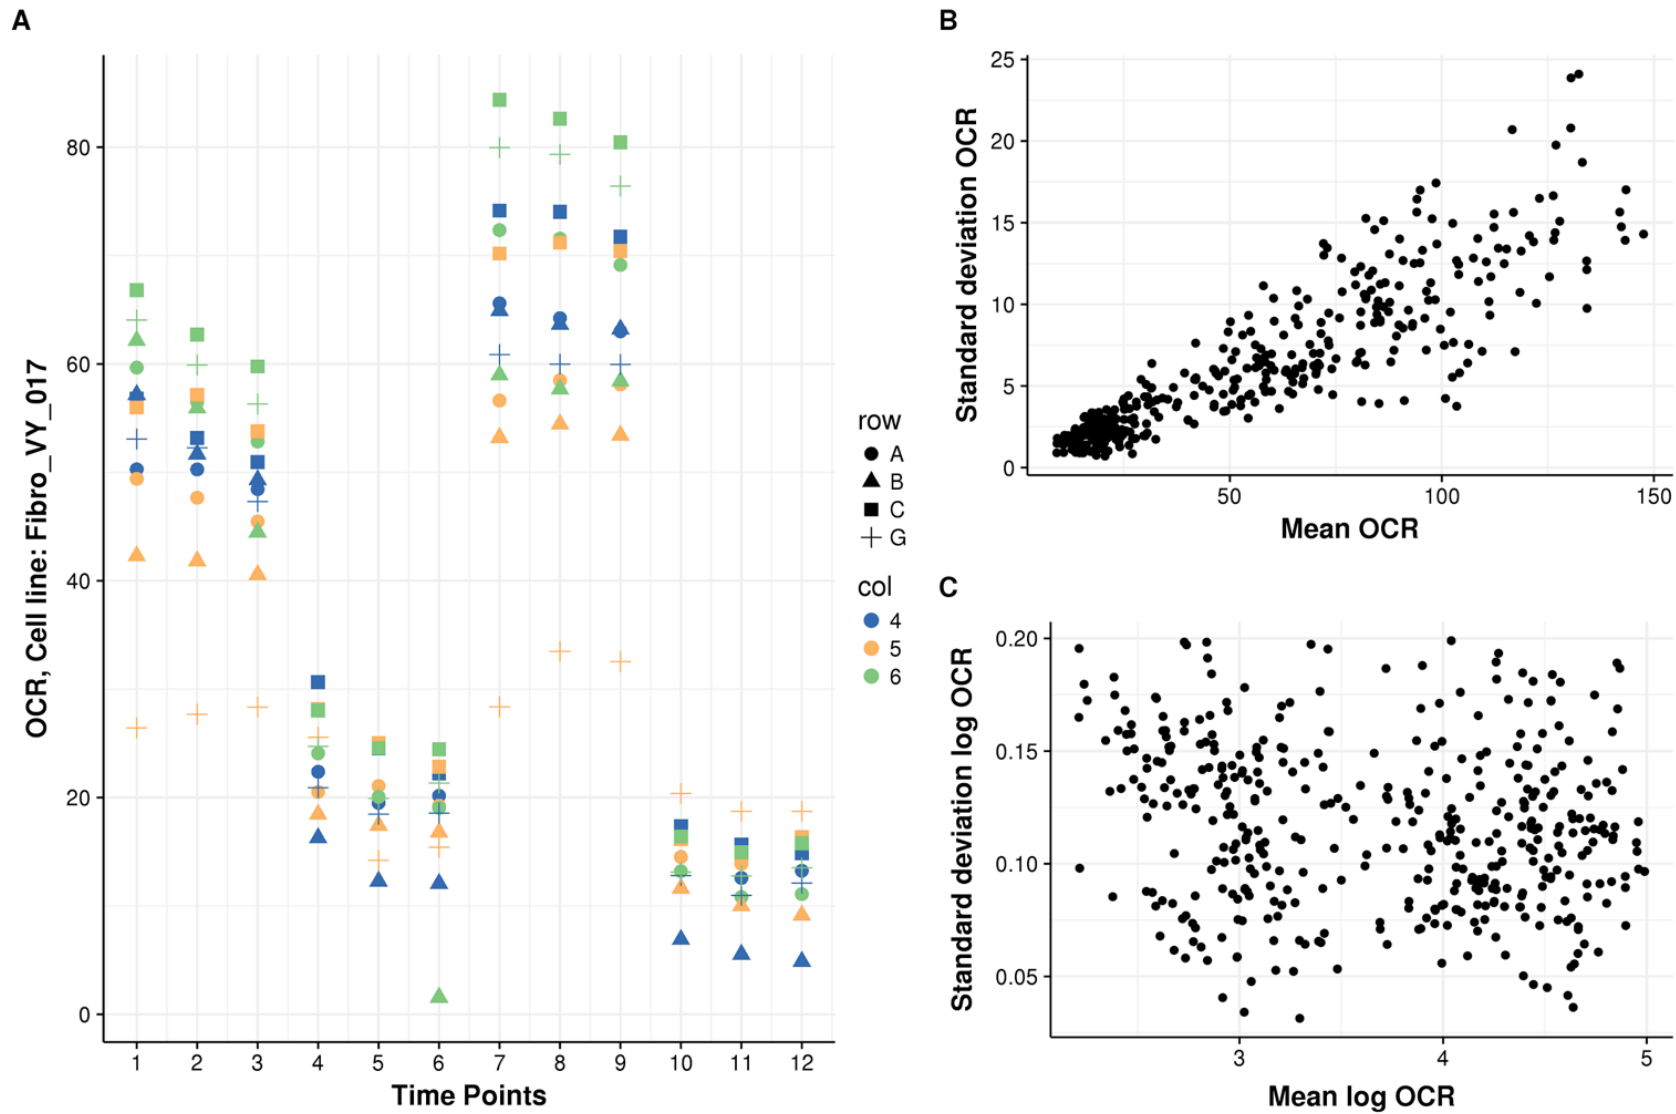

**Fig. 3**

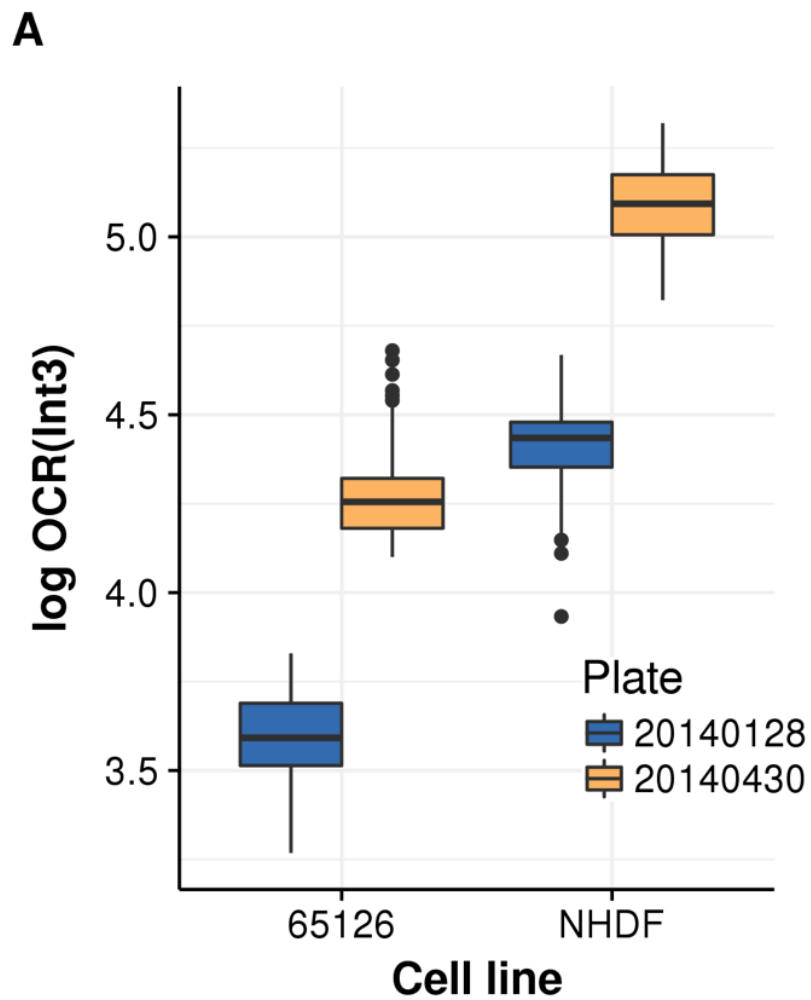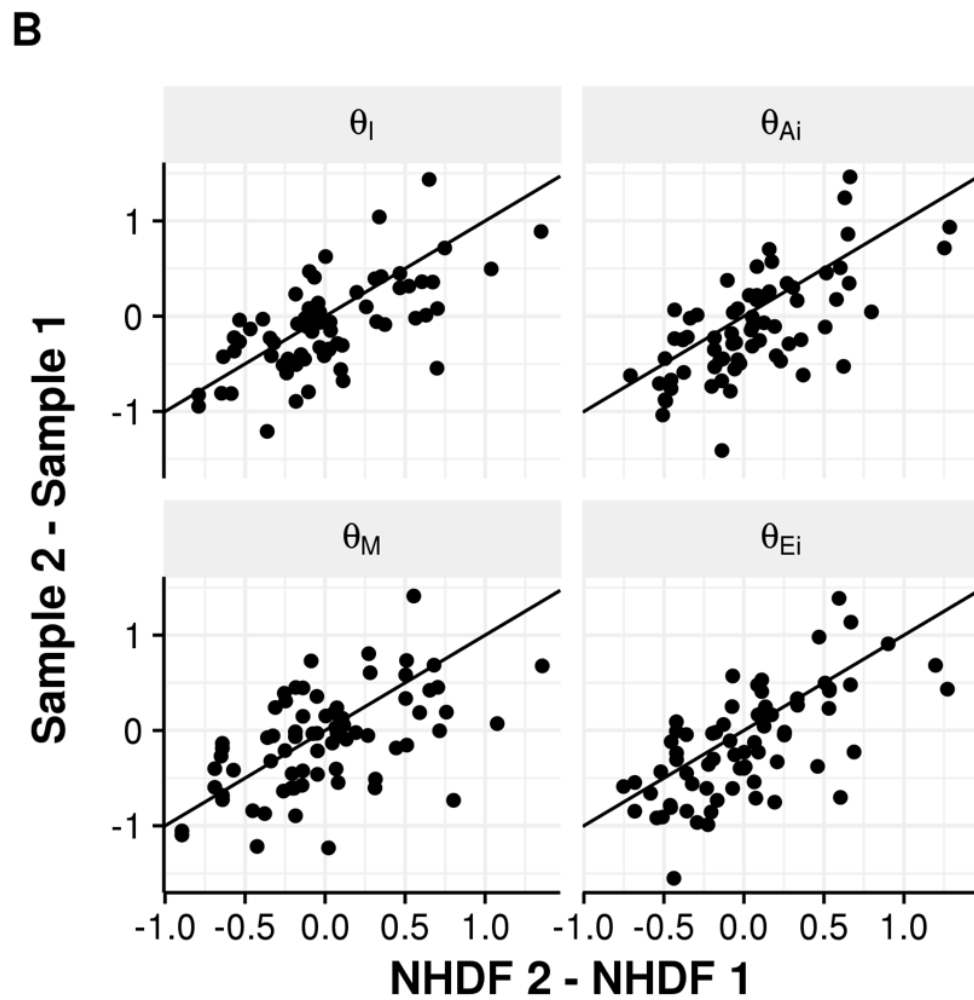

**Fig. 4**

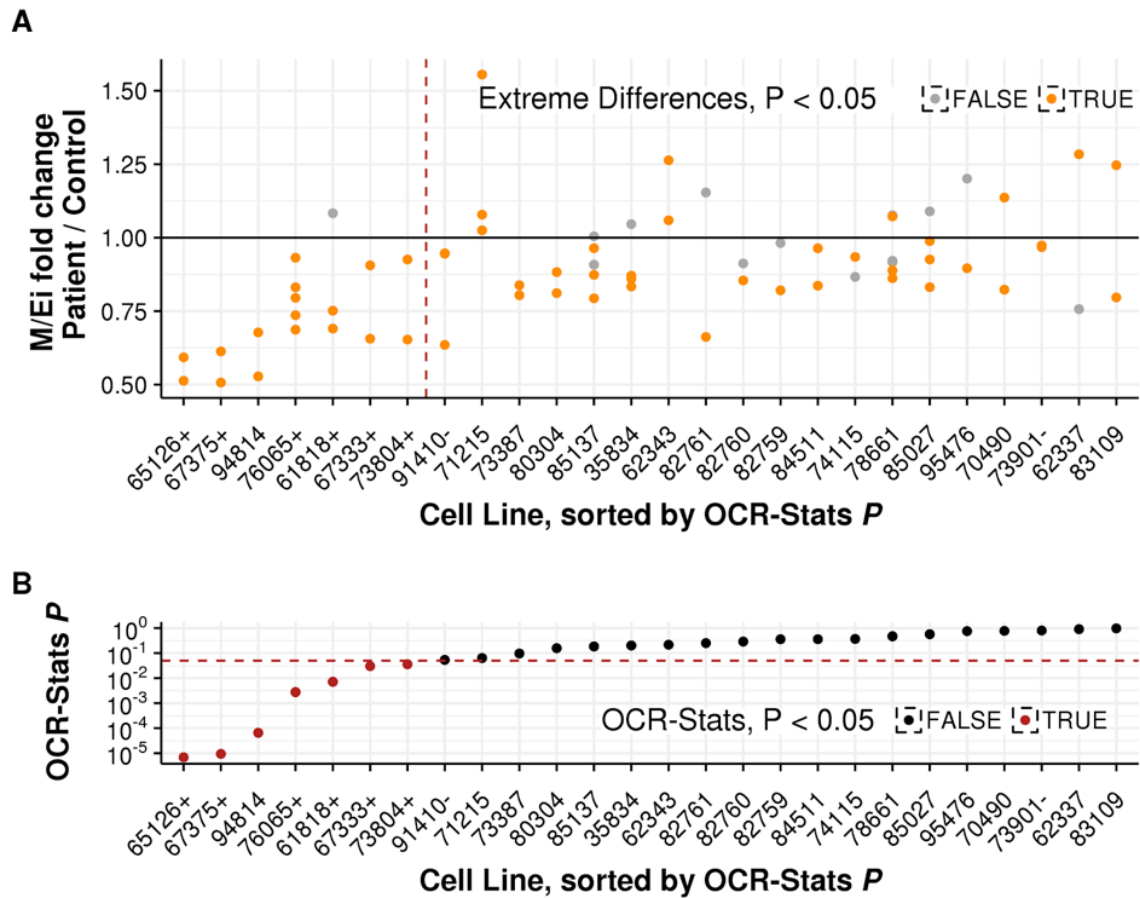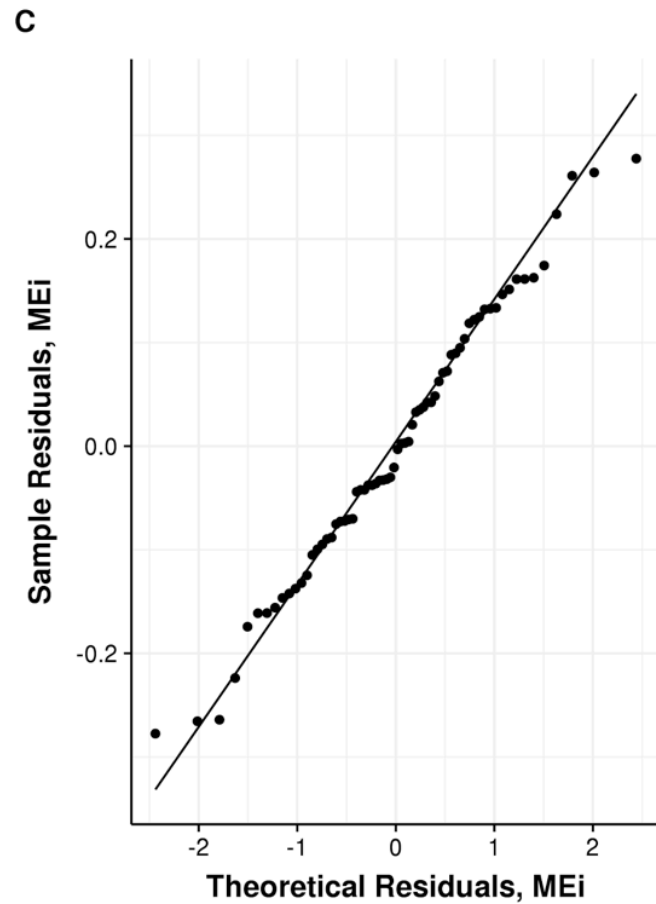

**Fig. 5**

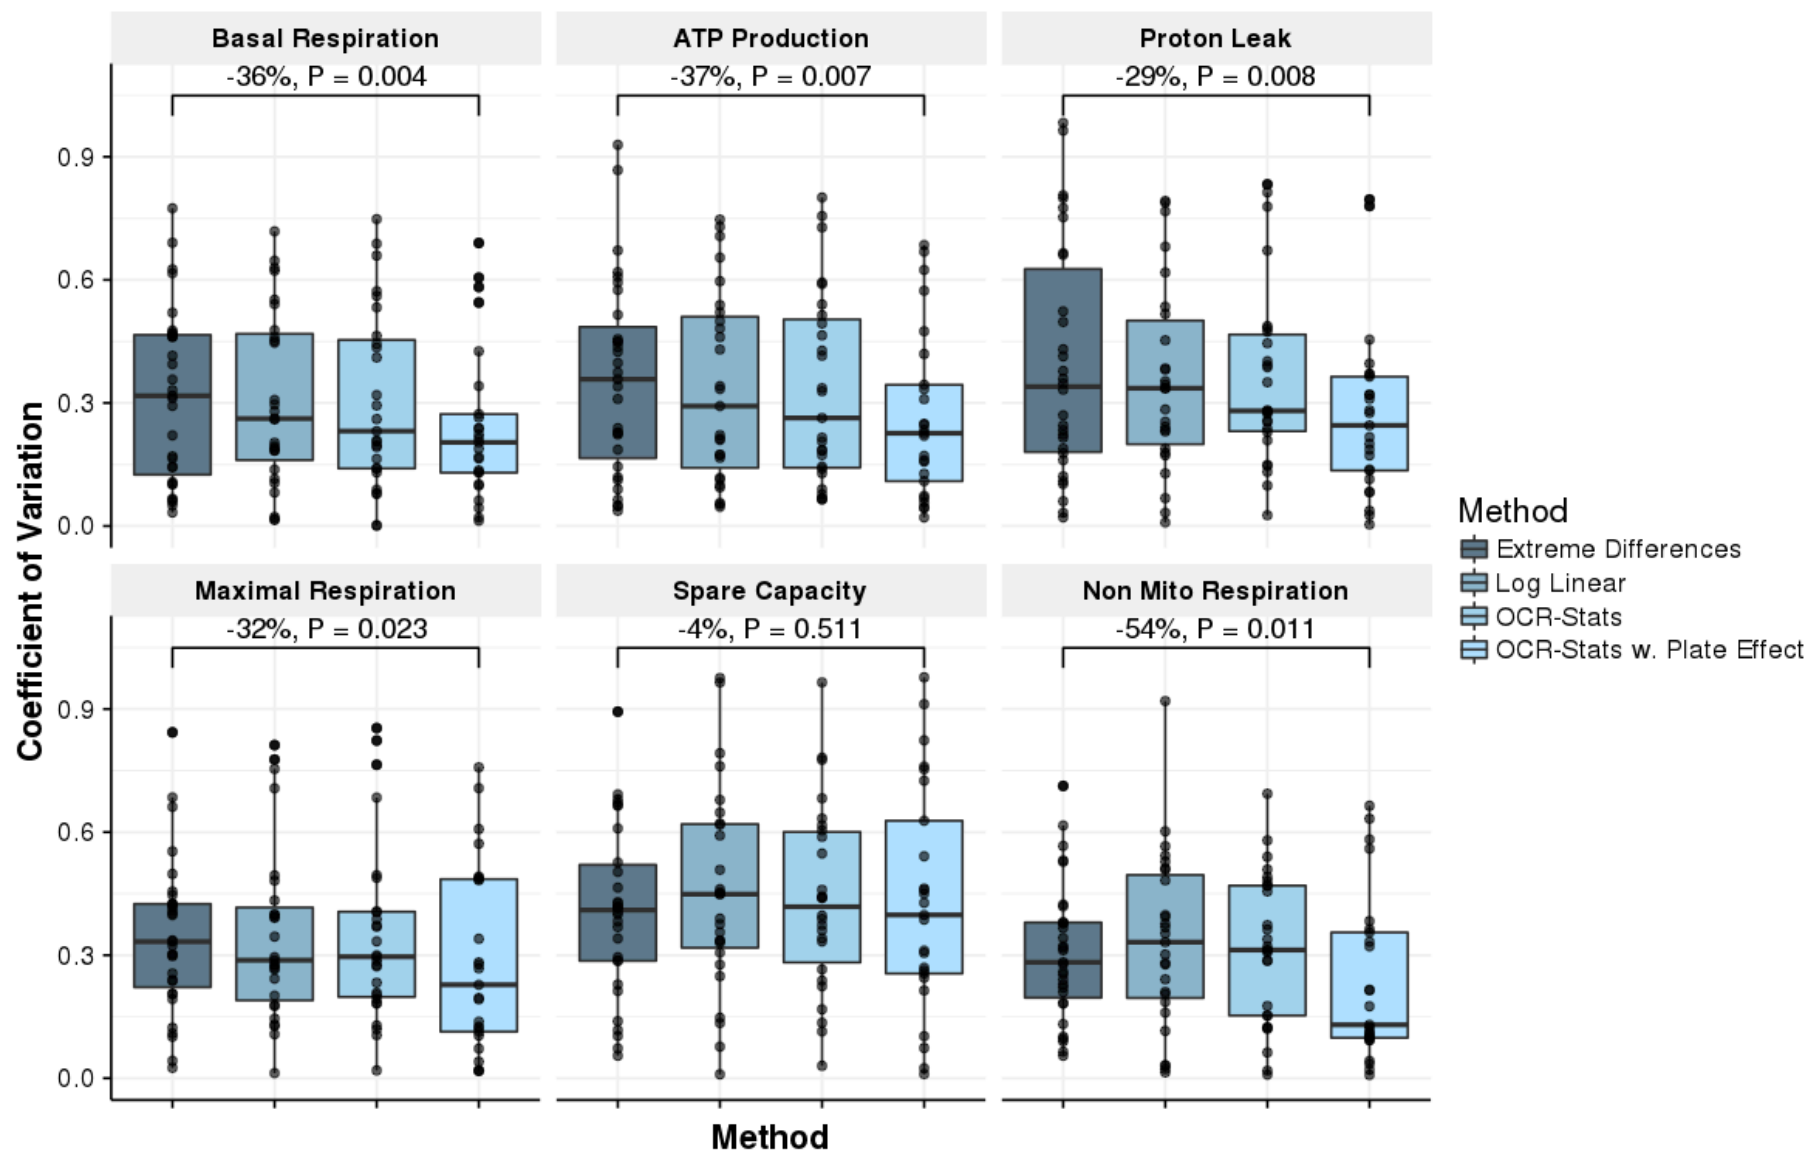

Source: https://www.biorxiv.org/content/early/2017/12/13/231522.full.pdf
